# Supplementary material
Source: MDPI journal article supplement (https://www.mdpi.com/2227-9040/10/1/13)
Supplement: s1 [file s1]

## (Supplementary Information)

### Fluorescence-Based Chemical Sensor for Detection of Melamine in Aqueous Solutions

Remya Radha, Rute F. Vitor, Mohammad H. Al-Sayah\*

Department of Biology, Chemistry and Environmental Sciences American University of Sharjah,  
Sharjah, United Arab Emirates.

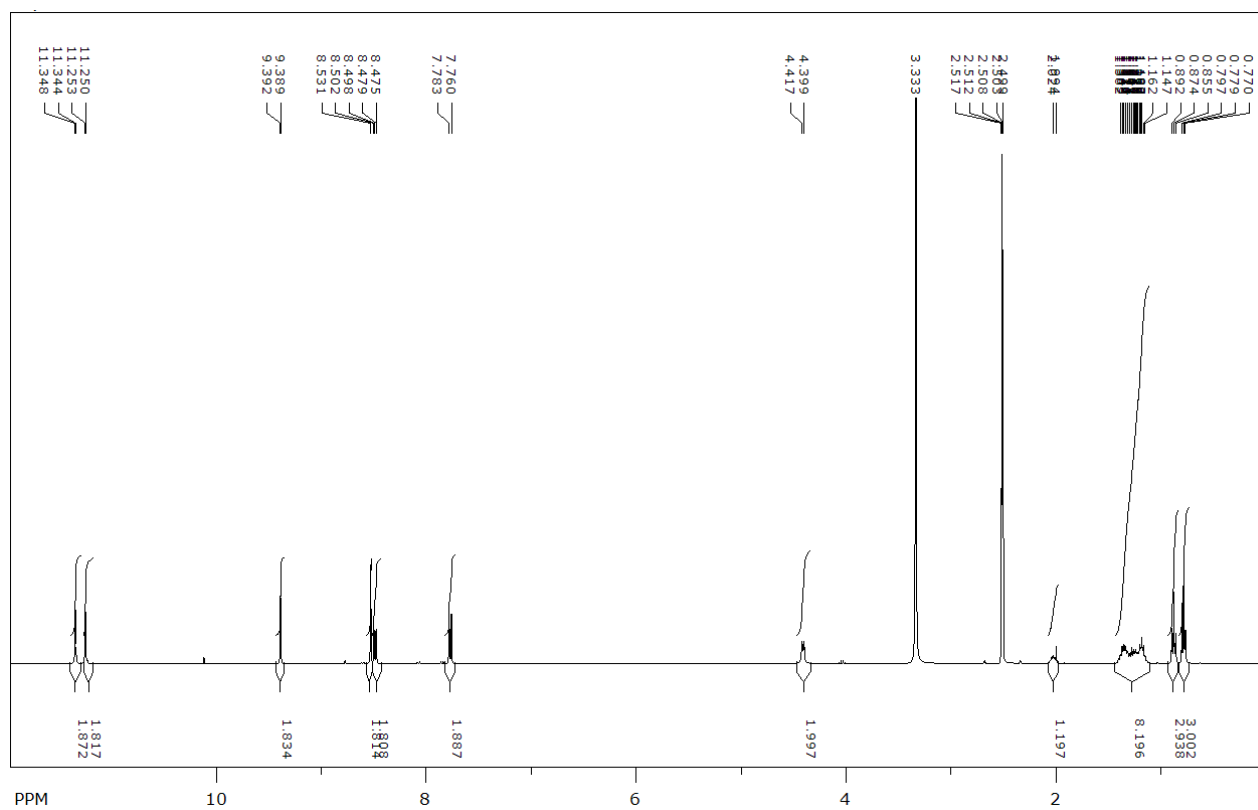

**Figure S1:** Proton NMR spectrum of CB in DMSO-d<sub>6</sub>

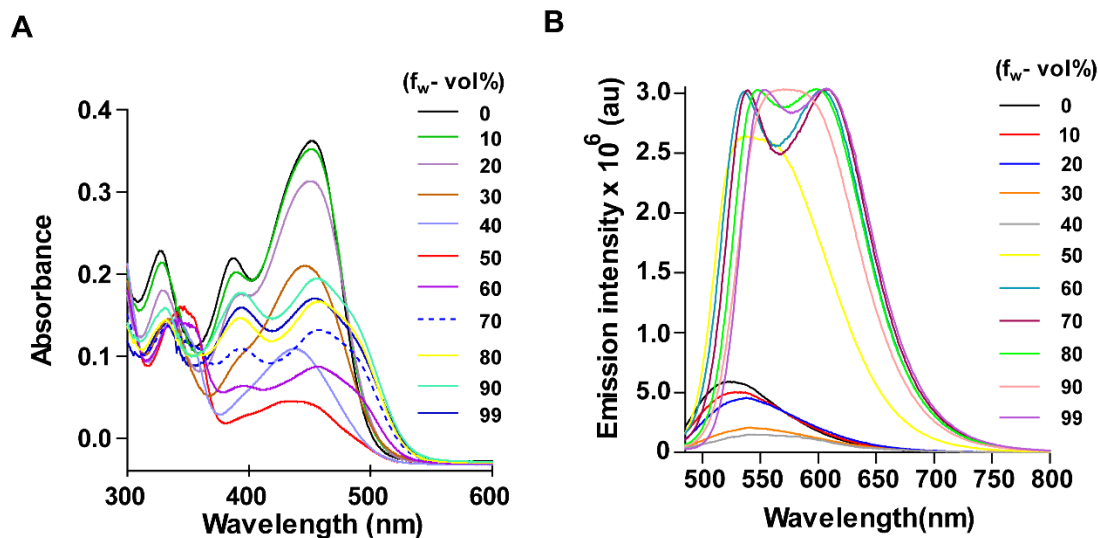

**Figure S2: Absorbance and fluorescence spectra of CB.** A) Emission spectra of CB (10  $\mu$ M) for different  $f_w$  (0-99%). B) UV-vis absorption spectra of CB (10  $\mu$ M) for  $f_w$  (0-99%).

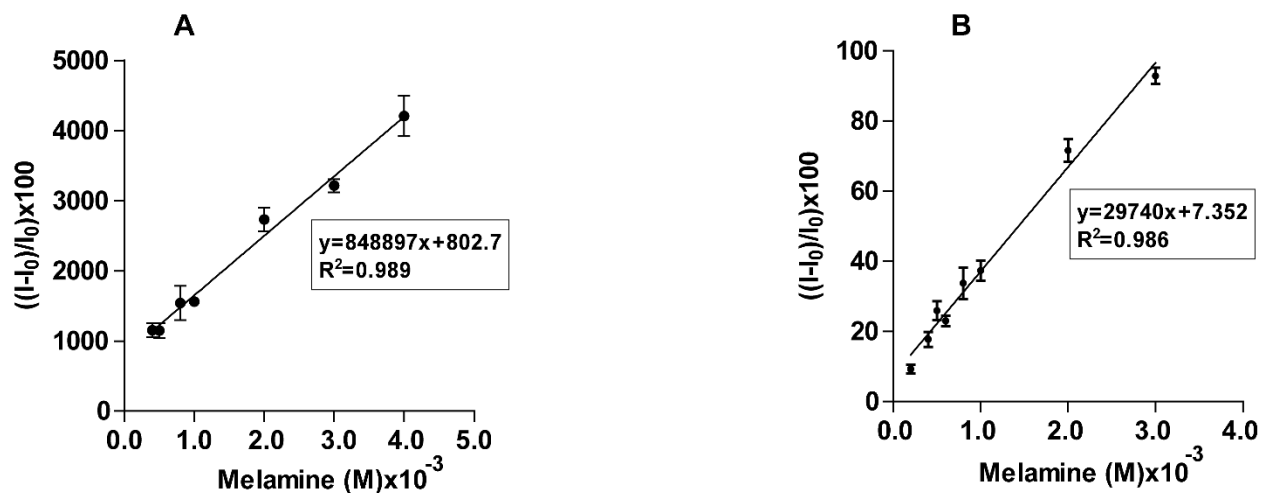

**Figure S3: Effect of melamine concentration in A) distilled water and B) milk aqueous system on the fluorescence intensity of CB-CA solution ( $\lambda_{em} = 520$  nm,  $\lambda_{ex} = 490$  nm).** For the microplate experiment, 'I' represents the emission intensity (au) obtained from well solutions having different melamine levels and  $I_0$  corresponds to the emission intensity of wells that are free of melamine. The error bars indicate the standard deviation values for the triplicate readings for the three different set of experiments.

**Table S1: Comparison of reported detection methods for melamine.**

| <b>Sample</b>          | <b>Detection method</b>                                                                                                         | <b>Limit of Detection (M)</b>                         | <b>Source</b>    |
|------------------------|---------------------------------------------------------------------------------------------------------------------------------|-------------------------------------------------------|------------------|
| Milk powder            | ELISA method based on monoclonal antibody                                                                                       | 50 ng/g<br>( $3.9 \times 10^{-7}$ M)                  | [1]              |
| Infant formula powder  | Microsphere-based flow cytometry                                                                                                | 0.70 ng/ml<br>( $5.5 \times 10^{-9}$ M)               | [2]              |
| Milk formula samples   | Solid-phase extraction with activated attapulgite as sorbent                                                                    | 0.15 ng/ml<br>( $1.18 \times 10^{-9}$ M)              | [3]              |
| Whole milk             | Using Aptamer-modified gold nanoparticles (AuNPs) with UV-Vis spectrometer                                                      | 0.5 mg/L<br>( $3.96 \times 10^{-6}$ M)                | [4]              |
| Milk                   | Surface-enhanced Raman scattering substrate array                                                                               | 2.5 ppb<br>( $1.98 \times 10^{-8}$ M)                 | [5]              |
| Milk and milk products | Gas chromatography-tandem mass spectrometry                                                                                     | 0.002 mg/kg<br>( $1.58 \times 10^{-8}$ M)             | [6]              |
| Milk and milk products | surface-enhanced Raman spectroscopy using cyclodextrin-decorated silver nanoparticles                                           | 3.0 $\mu\text{g L}^{-1}$<br>( $2.3 \times 10^{-5}$ M) | [7]              |
| Infant milk samples    | Electrochemical sensor detection using a modified glassy carbon electrode with ascorbic acid as the active recognition element. | $5.0 \times 10^{-9}$ M                                | [8]              |
| Aqueous samples        | Surface plasmon resonance based fiber optic sensor for the detection of melamine using molecular imprinting                     | $9.87 \times 10^{-9}$ M                               | [9]              |
| Milk and milk powder   | Differential pulse polarography.                                                                                                | $3.0 \times 10^{-7}$ M                                | [10]             |
| <b>Milk</b>            | <b>Current study</b>                                                                                                            | <b>15.4 ppm</b><br>( $1.22 \times 10^{-4}$ M)         | <b>This work</b> |

**References**

1. Sun, F.; Liu, L.; Kuang, H.; Xu, C. Development of ELISA for Melamine Detection in Milk Powder. *Food Agric. Immunol.* **2013**, *24*, 79–86, doi:10.1080/09540105.2011.641170.
2. Tsoi, T.-H.; Wong, W.-T. A Simple, Highly Sensitive, High Throughput and Organic Solvent-Free Screening Method for Melamine by Microsphere-Based Flow Cytometry Immunoassay. *Anal. Methods* **2015**, *7*, 5989–5995, doi:10.1039/C5AY00648A.
3. Wang, T.-T.; Xuan, R.-R.; Ma, J.-F.; Tan, Y.; Jin, Z.-F.; Chen, Y.-H.; Zhang, L.-H.; Zhang, Y.-K. Using Activated Attapulgite as Sorbent for Solid-Phase Extraction of Melamine in Milk Formula Samples. *Anal. Bioanal. Chem.* **2016**, *408*, 6671–6677, doi:10.1007/s00216-016-9779-2.

4. Yun, W.; Li, H.; Chen, S.; Tu, D.; Xie, W.; Huang, Y. Aptamer-Based Rapid Visual Biosensing of Melamine in Whole Milk. *Eur. Food Res. Technol.* **2014**, *238*, 989–995, doi:10.1007/s00217-014-2166-3.
5. Rajapandiyan, P.; Tang, W.-L.; Yang, J. Rapid Detection of Melamine in Milk Liquid and Powder by Surface-Enhanced Raman Scattering Substrate Array. *Food Control* **2015**, *56*, 155–160, doi:10.1016/j.foodcont.2015.03.028.
6. Miao, H.; Fan, S.; Wu, Y.-N.; Zhang, L.; Zhou, P.-P.; Chen, H.-J.; Zhao, Y.-F.; Li, J.-G. Simultaneous Determination of Melamine, Ammelide, Ammeline, and Cyanuric Acid in Milk and Milk Products by Gas Chromatography-Tandem Mass Spectrometry. *Biomed. Environ. Sci.* **2009**, *22*, 87–94, doi:10.1016/S0895-3988(09)60027-1.
7. Ma, P.; Liang, F.; Sun, Y.; Jin, Y.; Chen, Y.; Wang, X.; Zhang, H.; Gao, D.; Song, D. Rapid Determination of Melamine in Milk and Milk Powder by Surface-Enhanced Raman Spectroscopy and Using Cyclodextrin-Decorated Silver Nanoparticles. *Microchim. Acta* **2013**, *180*, 1173–1180, doi:10.1007/s00604-013-1059-7.
8. Daizy, M.; Tarafder, C.; Al-Mamun, Md.R.; Liu, X.; Aly Saad Aly, M.; Khan, M.Z.H. Electrochemical Detection of Melamine by Using Reduced Graphene Oxide–Copper Nanoflowers Modified Glassy Carbon Electrode. *ACS Omega* **2019**, *4*, 20324–20329, doi:10.1021/acsomega.9b02827.
9. Shrivastav, A.M.; Mishra, S.K.; Gupta, B.D. Fiber Optic SPR Sensor for the Detection of Melamine Using Molecular Imprinting. *Sens. Actuators B Chem.* **2015**, *212*, 404–410, doi:10.1016/j.snb.2015.02.028.
10. Yilmaz, Ü.T.; Yazar, Z. Determination of Melamine by Differential Pulse Polarography/Application to Milk and Milk Powder. *Food Anal. Methods* **2012**, *5*, 119–125, doi:10.1007/s12161-011-9214-4.
